# Supplementary material for: Vinyltriethoxysilane as an electrolyte additive to improve the safety of lithium-ion batteries
Source: Royal Society of Chemistry journal article supplement (doi:10.1039/c6ta10210g), 2017-01-01
Supplement: c6ta10210g1.pdf [file c6ta10210g1.pdf]

## Supporting information

### **Vinyltriethoxysilane as an electrolyte additive to improve the safety of lithium-ion batteries**

Renjie Chen<sup>ab</sup>, Yuanyuan Zhao<sup>a</sup>, Yuejiao Li<sup>\*ab</sup>, Yusheng Ye<sup>a</sup>, Yajing Li<sup>a</sup>, Feng Wu<sup>ab</sup>  
and Shi Chen<sup>ab</sup>

a. Beijing Key Laboratory of Environmental Science and Engineering, School of Materials Science & Engineering, Beijing Institute of Technology, Beijing, 100081, China

b. Collaborative Innovation Center of Electric Vehicles in Beijing, Beijing 100081, China

\*Corresponding author at: Beijing Key Laboratory of Environmental Science and Engineering, School of Materials Science & Engineering, Beijing Institute of Technology, Beijing 100081, China. Tel.: +86-010-68912528; Fax: +86-010-68451429

E-mail addresses: [lyj@bit.edu.cn](mailto:lyj@bit.edu.cn) (Y. Li)

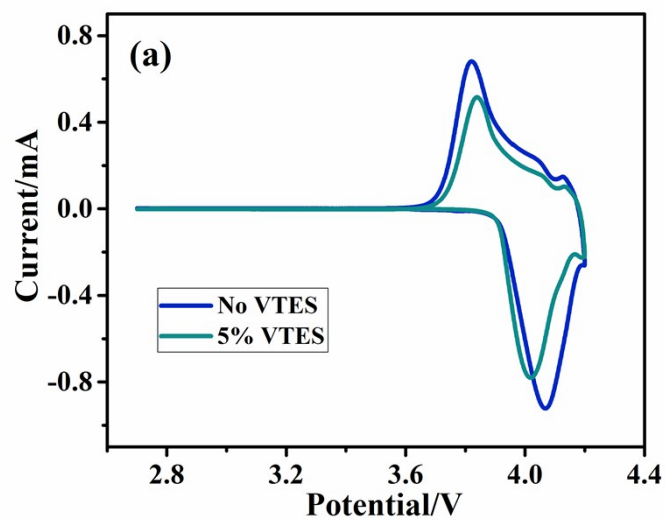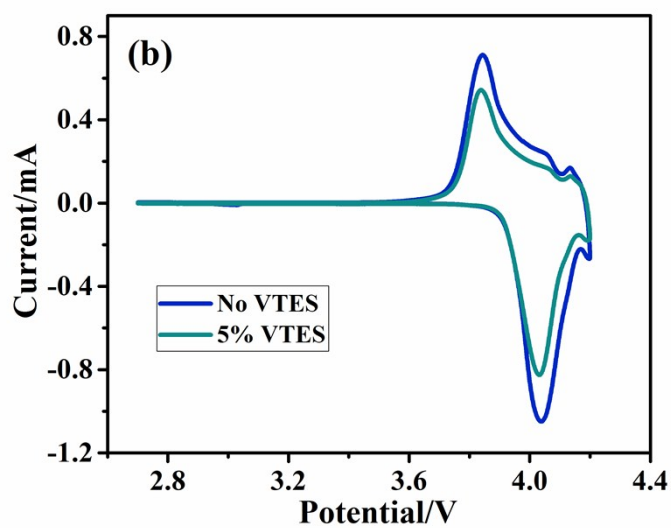

**Fig. S1** Cyclic voltammety curves of  $\text{LiCoO}_2$  in electrolytes with and without VTES additive at a scan rate of  $0.1 \text{ mV}\cdot\text{s}^{-1}$ : (a) 1<sup>st</sup> cycle; (b) 2<sup>nd</sup> cycle.

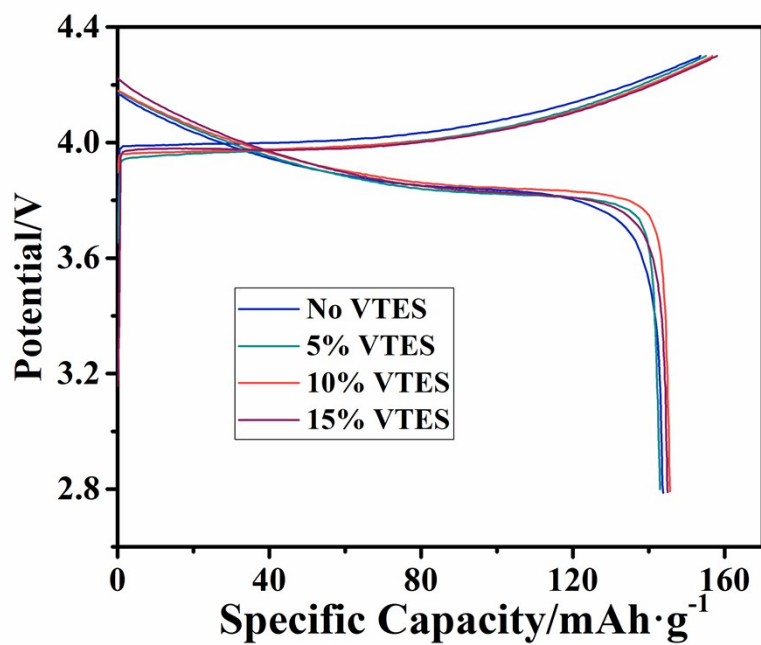

**Fig. S2** Charge–discharge curve performance of LiCoO<sub>2</sub>/Li cell using 1 M LiPF<sub>6</sub>/EC:EMC:DMC (1:1:1, v/v/v) as electrolytes with and without VTES.
